# Supplementary material for: Selective electrostatic sorption of water-soluble anionic molecules over electrospun cationic polymer fibers
Source: Royal Society of Chemistry journal article supplement (doi:10.1039/d5ta00290g), 2025-01-01
Supplement: d5ta00290g1.pdf [file d5ta00290g1.pdf]

## Supporting Information

### **Selective Electrostatic Sorption of Water-Soluble Anionic Molecules over Electrospun Cationic Polymer Fibers**

Worood A. El-Mehalmey,<sup>a</sup> Ashraf Helmy,<sup>a</sup> Mohamed A. Seleem,<sup>b,c</sup> Muhamed Amin,<sup>d</sup> Abdelrahman H. Mayhoub,<sup>b,c</sup> and Mohamed H. Alkordi\*<sup>a</sup>

<sup>a</sup> Center for Material Science, Zewail City of Science and Technology, Giza 12578, Egypt

<sup>b</sup> Department of Pharmaceutical Organic Chemistry, Faculty of Pharmacy, Al-Azhar University, Cairo 11884, Egypt.

<sup>c</sup> Center of Certified Reference Materials, Zewail City of Science and Technology, Giza 12578, Egypt.

<sup>d</sup> Laboratory of Computational Biology, National Heart, Lung and Blood, Institute, National Institutes of Health, Bethesda, Maryland 20892, USA.  
malkordi@zewailcity.edu.eg

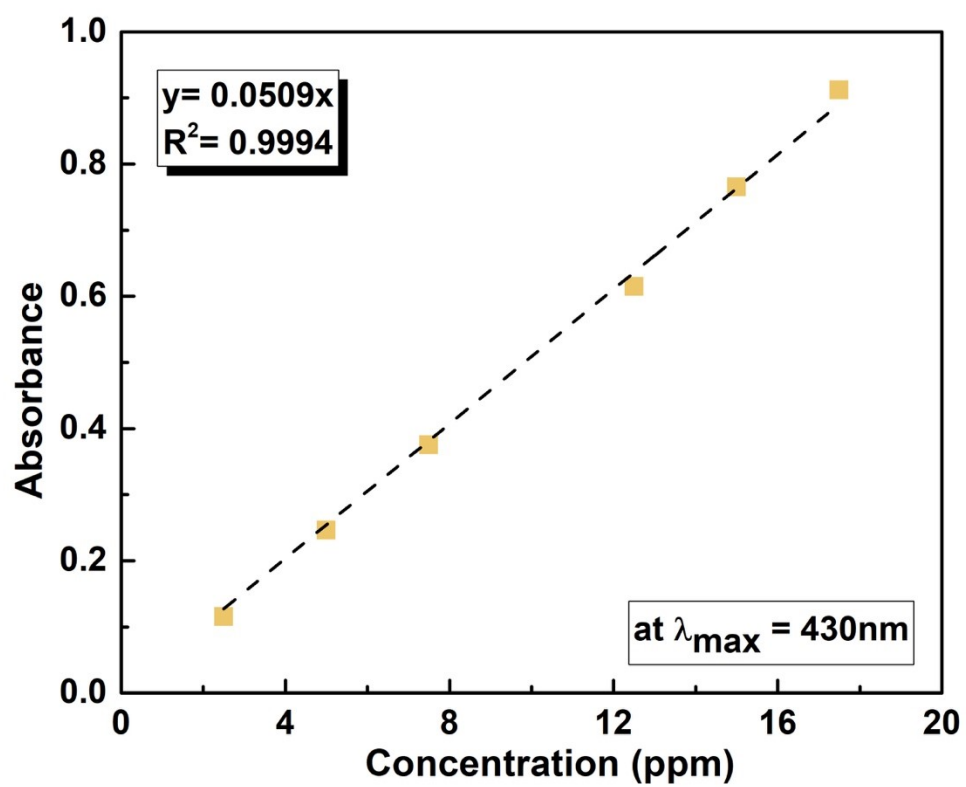

**Figure S1.** Calibration Curve of Phenol Red at 430nm.

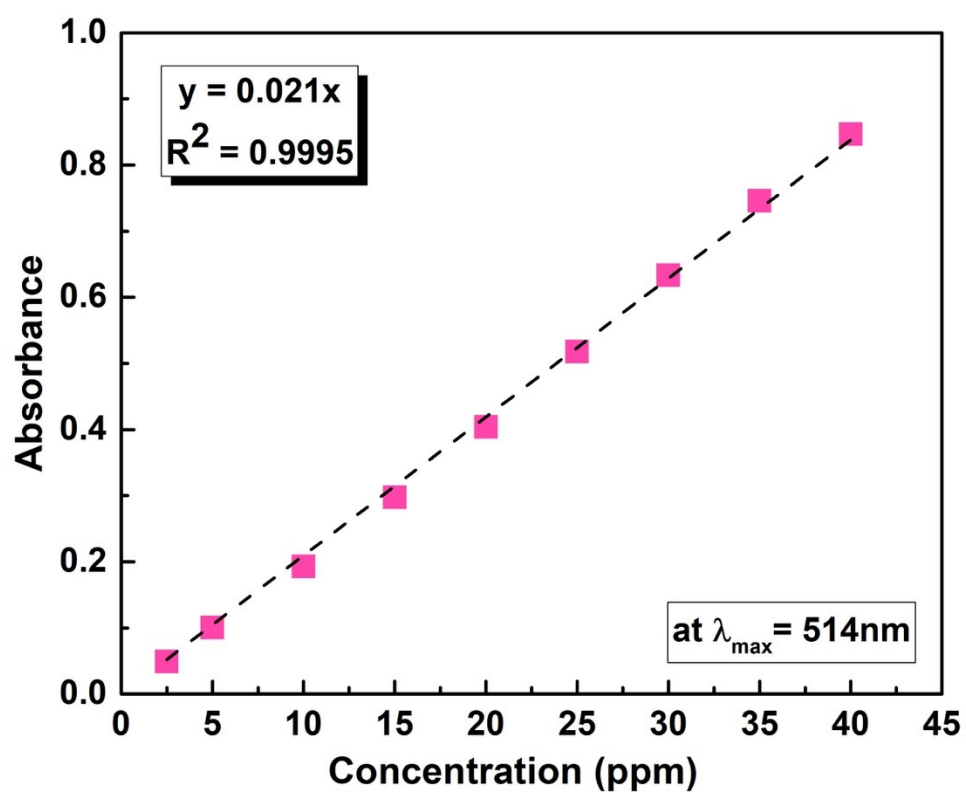

**Figure S2.** Calibration Curve of Eosin Yellow at 514nm.

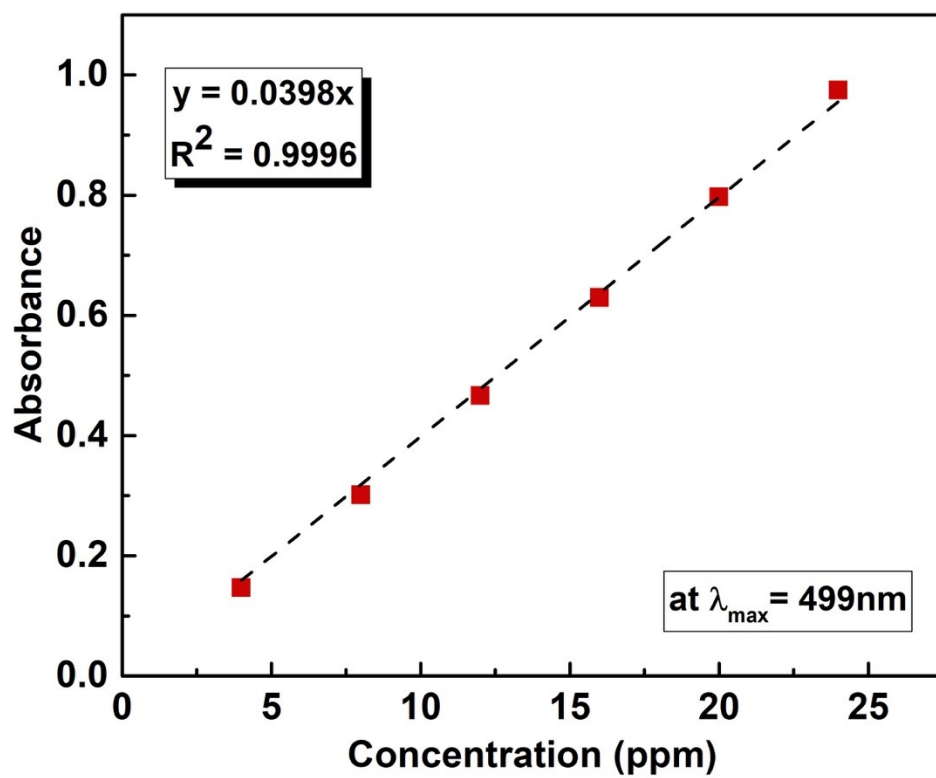

**Figure S3.** Calibration Curve of Congo Red at 499nm.
